# Supplementary material for: A dual pH- and reduction-responsive anticancer drug delivery system based on PEG–SS–poly(amino acid) block copolymer
Source: Royal Society of Chemistry journal article supplement (doi:10.1039/c7ra04254j), 2017-01-01
Supplement: c7ra04254j1.pdf [file c7ra04254j1.pdf]

## Supporting Information

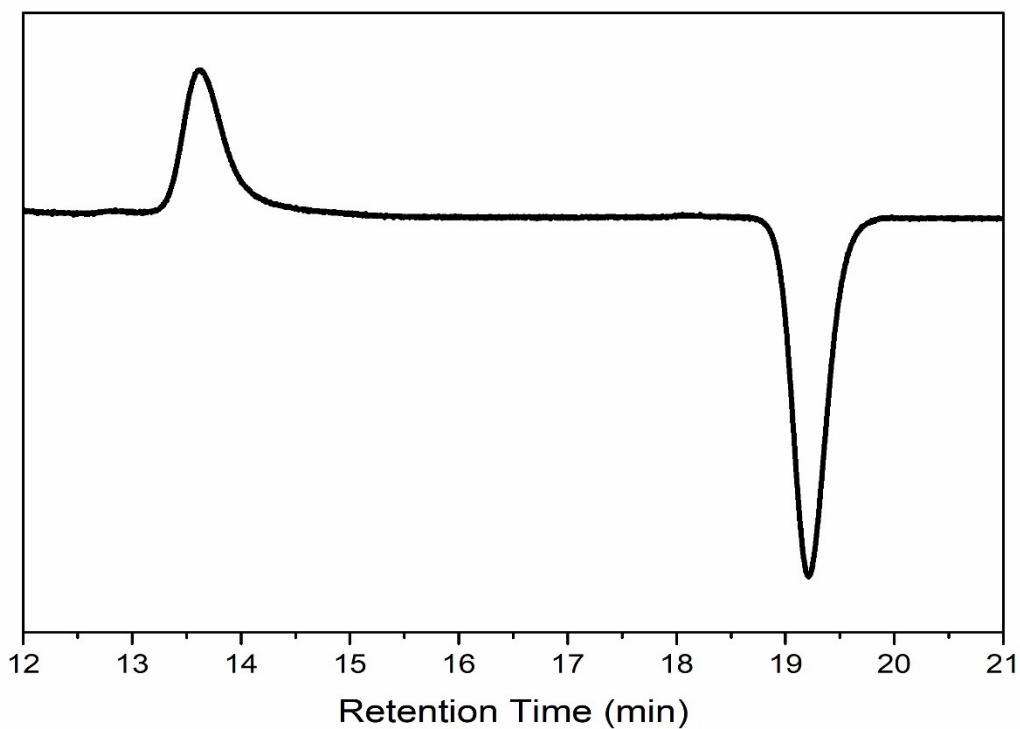

Fig. S1. GPC spectrum of mPEG-SS-PSI.

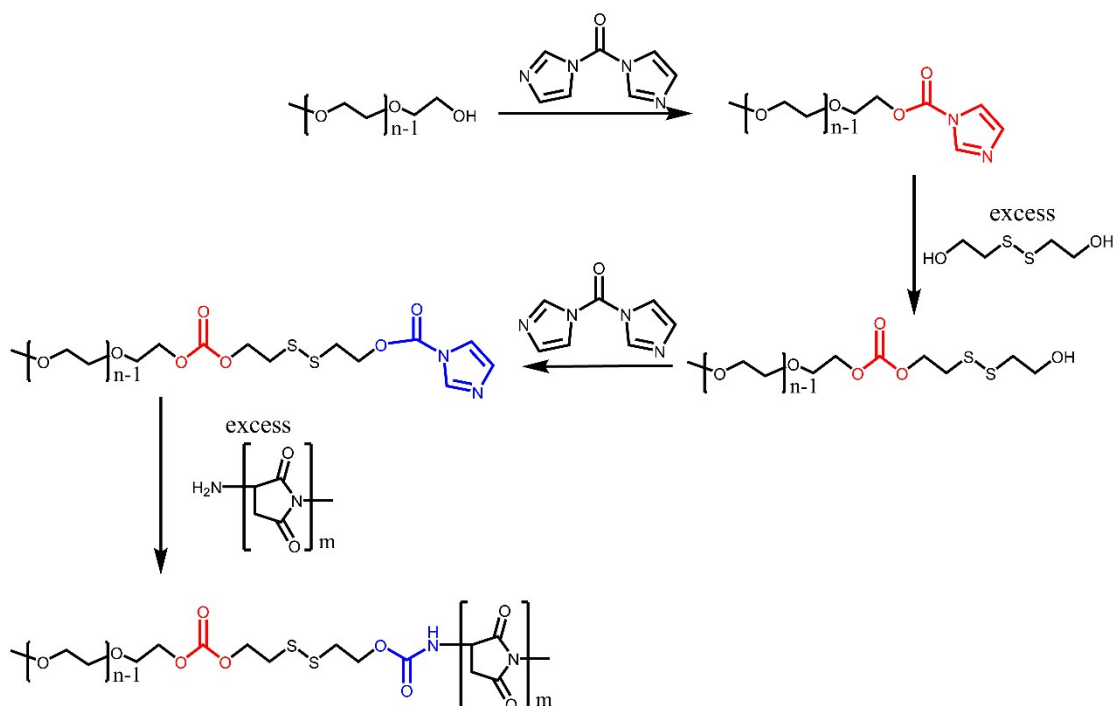

Fig. S2. The detailed synthesis route of mPEG-SS-PSI.

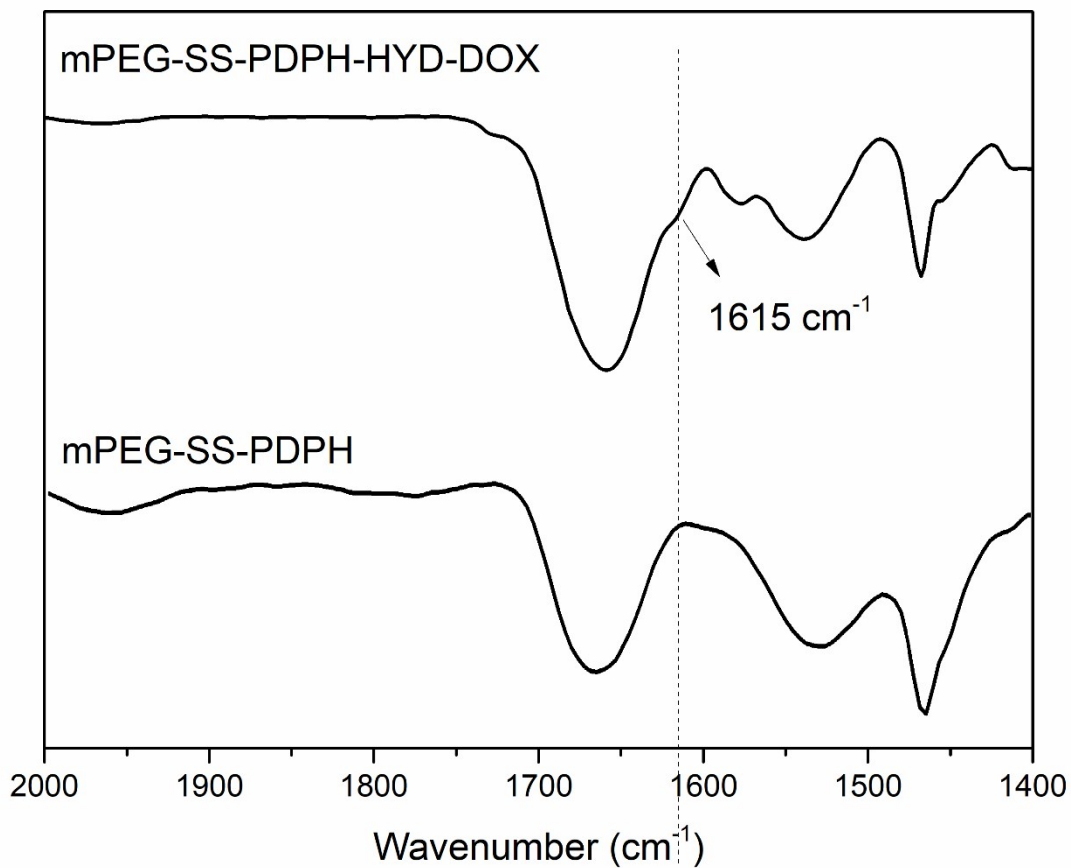

Fig. S3. FT-IR spectra of mPEG-SS-PDPH-hyd-DOX and mPEG-SS-PDPH. The peak at 1615 cm<sup>-1</sup> in the FT-IR spectrum of mPEG-SS-PDPH-hyd-DOX, corresponding to the stretching vibration of C=N in the hydrazone bonds, suggested a successful conjugation of DOX and mPEG-SS-PDPH.
